# Supplementary material for: Adsorption driven formate reforming into hydride and tandem hydrogenation of nitrophenol to amine over PdOx catalysts
Source: Royal Society of Chemistry journal article supplement (doi:10.1039/d0cy01704c), 2020-01-01
Supplement: d0cy01704c1.pdf [file d0cy01704c1.pdf]

## Electronic Supplementary Information

### Adsorption Driven Formate Reforming into Hydride and Tandem

### Hydrogenation of Nitrophenol to Amine over PdO<sub>x</sub> Catalysts

Xiaohui Zhu <sup>a,b</sup>, Shipan Liang<sup>b</sup>, Shuang Chen<sup>b</sup>, Xiangdong Liu<sup>\*a,b</sup> and Renhong Li<sup>\*a,b</sup>

<sup>a</sup>College of Textile Science and Engineering (International Institute of Silk), Zhejiang Sci-Tech University, Hangzhou, Zhejiang Province (China).

<sup>b</sup>School of Materials Science & Engineering, Zhejiang Sci-Tech University, Hangzhou, Zhejiang Province (China)

\*Corresponding author:

E-mail: lirenhong@zstu.edu.cn (R.H. Li); liuxd2007@yeah.net (X.D.Liu)

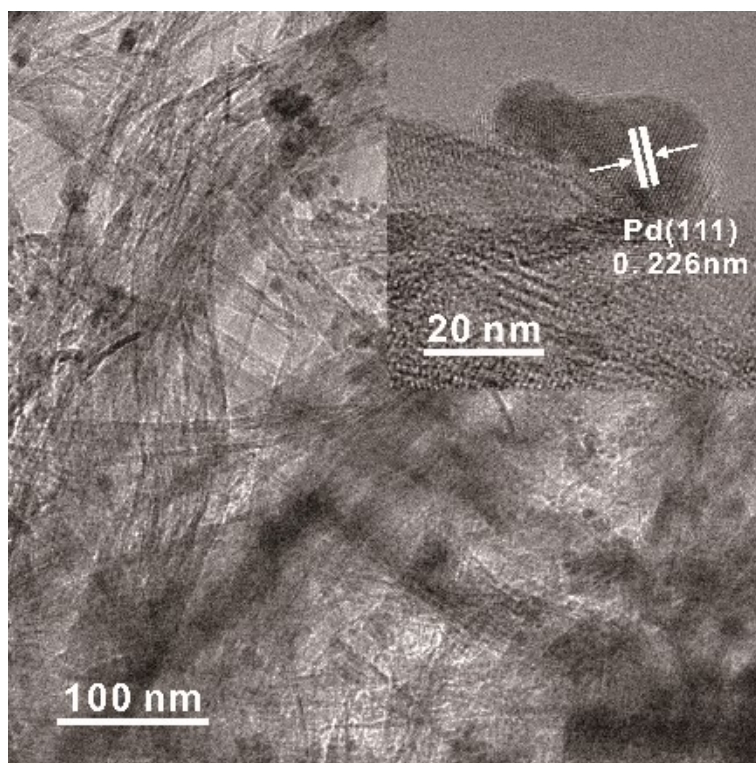

**Figure S1** TEM image of 1.0 wt% Pd/TiNTs sample calcined under  $N_2$  (inset shows the HR-TEM image of a single Pd NP).

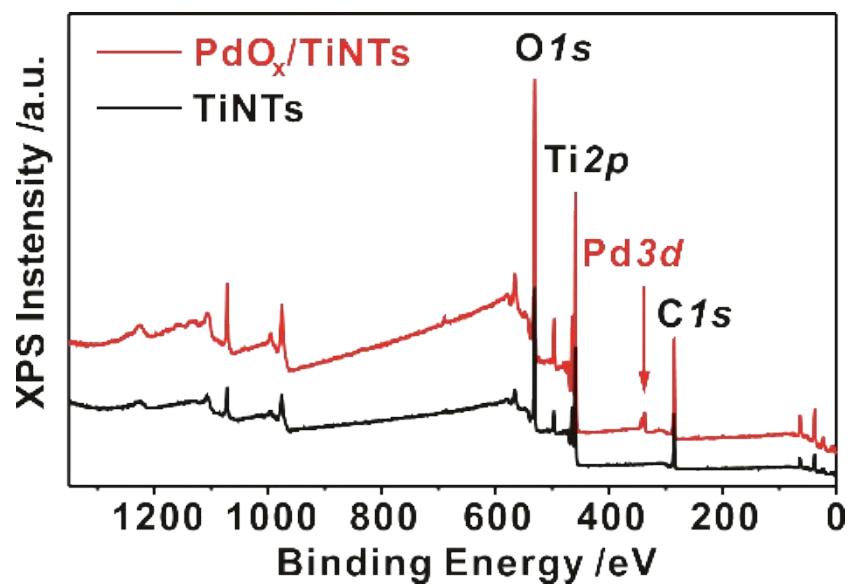

Figure S2 Full XPS spectral of PdO<sub>x</sub>/TiNTs and TiNTs.

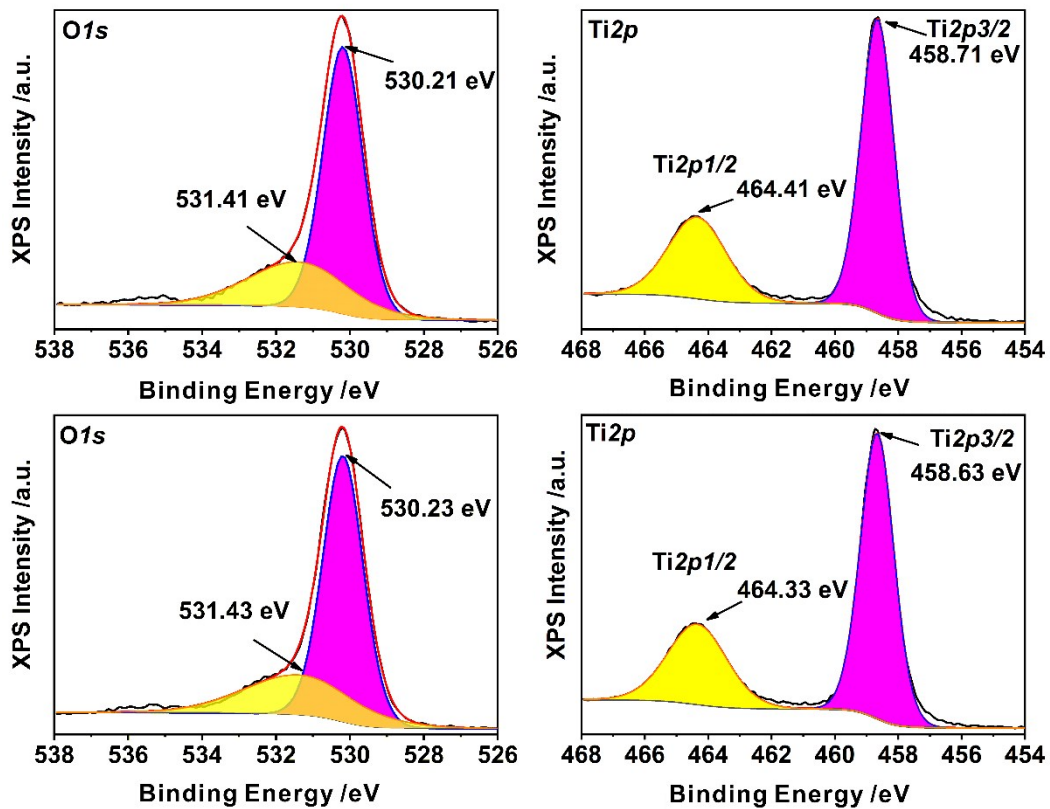

**Figure S3** High resolution Ti2p and O1s XPS spectra of 1.0 wt% Pd/TiNTs samples calcined under N<sub>2</sub> or O<sub>2</sub>.

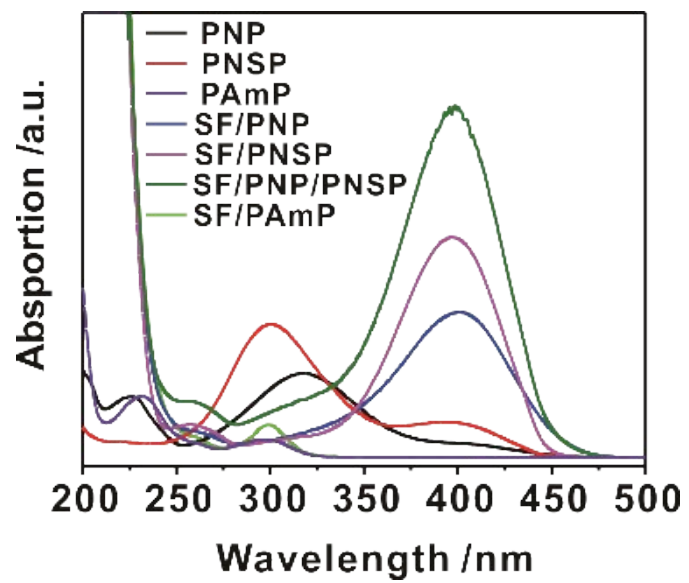

Figure S4 UV-Vis spectra of different solution.

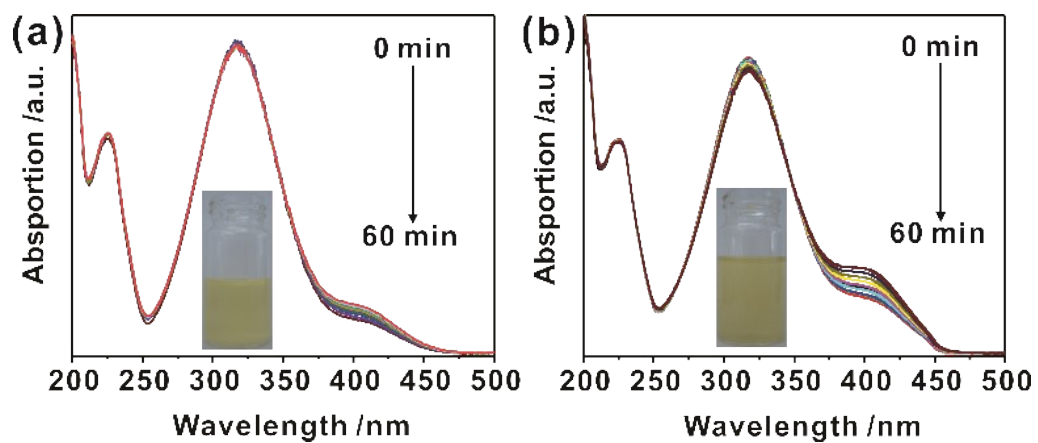

**Figure S5** UV-Vis spectral of PNP reduction reaction in the absence of SF: (a) pure TiNTs and (b) PdO<sub>x</sub>/TiNTs.

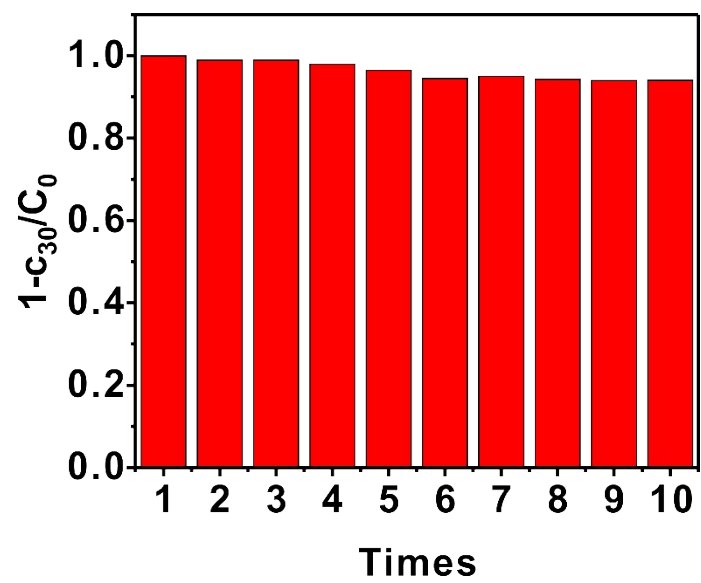

**Figure S6** Recycle experiments of PdO<sub>x</sub>/TiNTs. C<sub>0</sub> and C<sub>30</sub> indicate the concentration of PNP solution at 0 and 30 min, respectively.

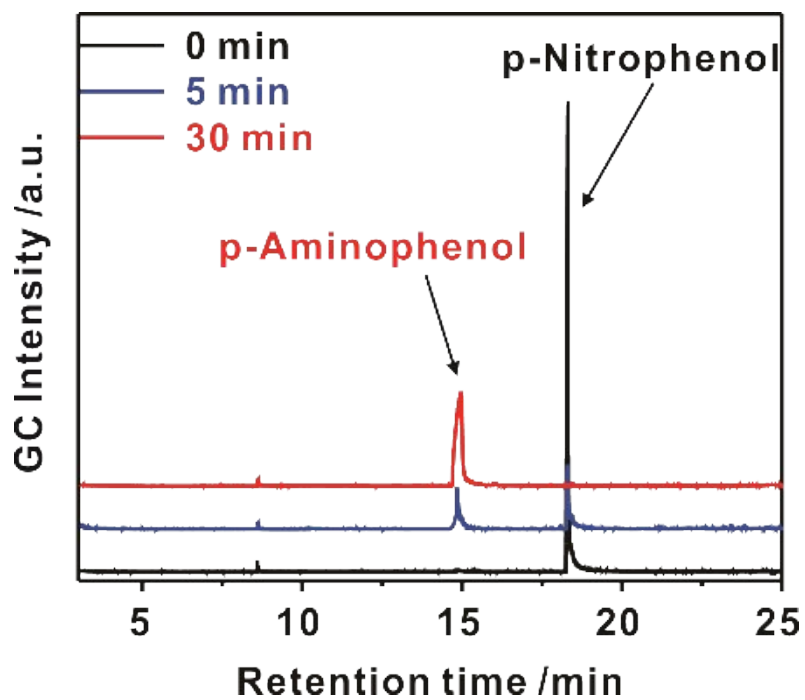

**Figure S7** GC spectra of PNP reduction reaction at 0, 5, and 30 min. Extractive solvent: ethyl acetate.



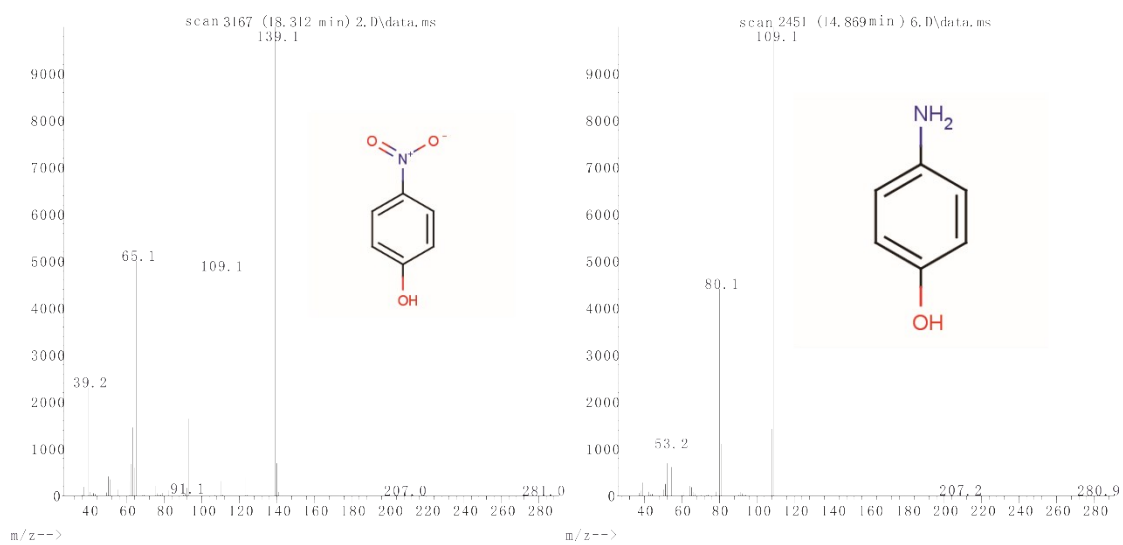

**Figure S8** GC-MS spectra of the corresponding GC retention time positions shown in Figure S7.

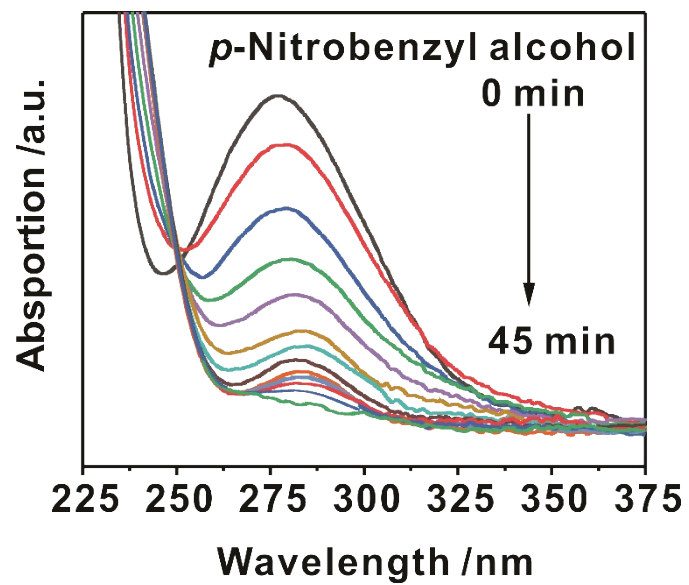

Figure S9 UV-Vis spectra of *p*-nitrobenzyl alcohol as a function of reaction time.

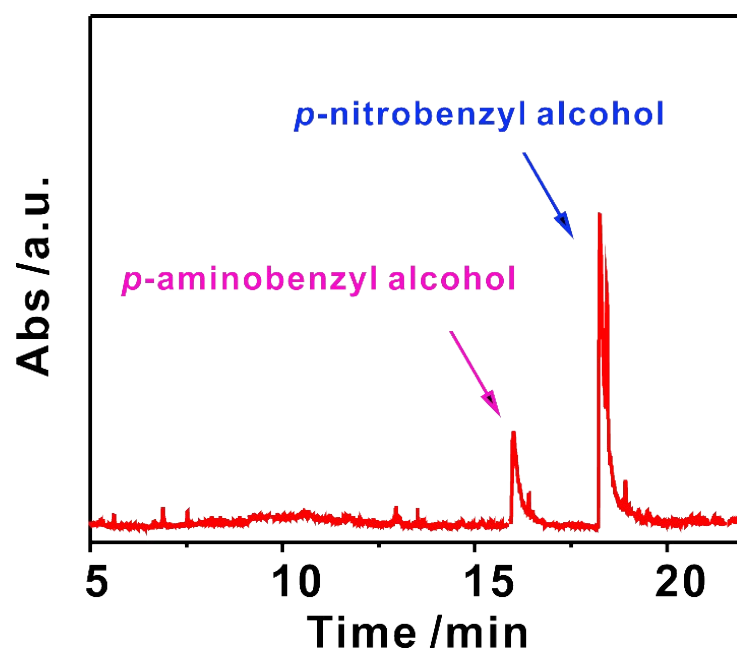

**Figure S10** GC spectra of *p*-nitrobenzyl alcohol after 5 min reaction. Extractive solvent: ethyl acetate.

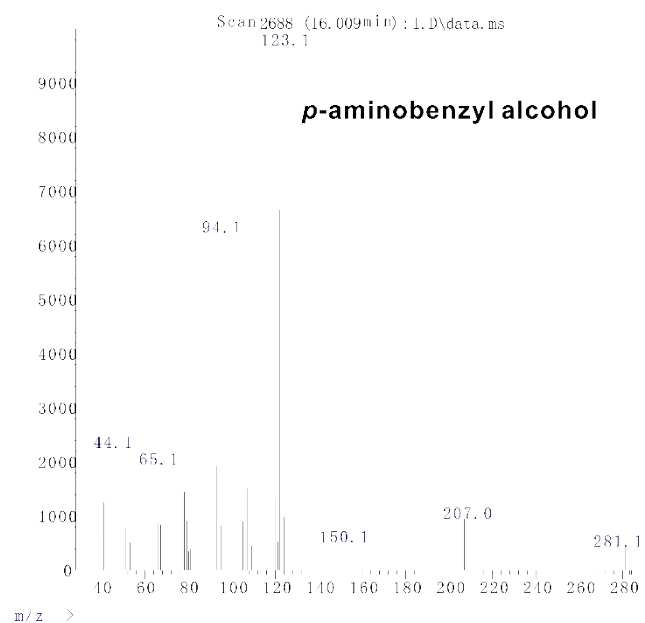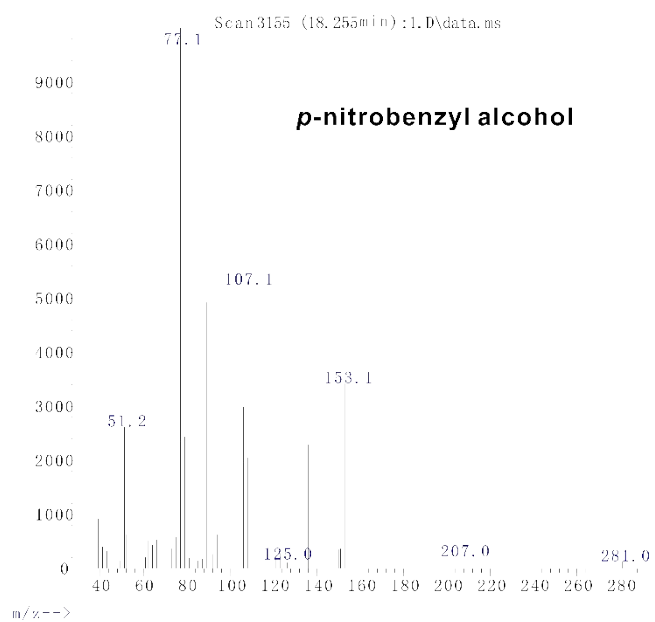

Figure S11 GC-MS spectra of GC retention time positions shown in Figure S10.

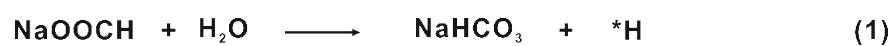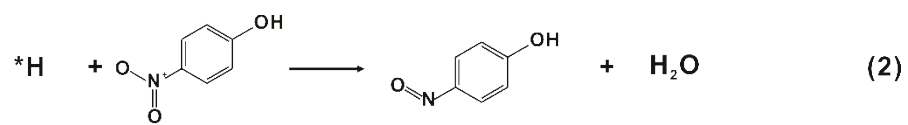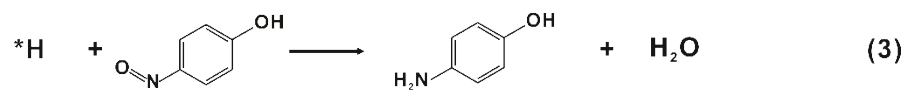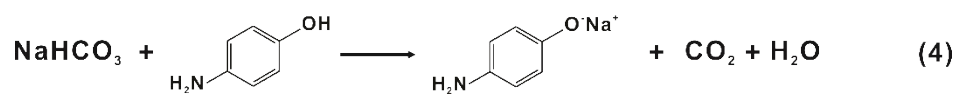

**Figure S12** Schematic diagram of PdO<sub>x</sub>/TiNTs catalyze PNP in the presence of SF under ambient conditions.

**Table S1** Comparison of the catalyst properties during reduction PNP to PAmP under ambient conditions.

| Entry          | Catalysts                                         | Hydrogen source                                | Temperature (°C) | TOF (h <sup>-1</sup> ) | Selectivity (%) | Rference            |
|----------------|---------------------------------------------------|------------------------------------------------|------------------|------------------------|-----------------|---------------------|
| 1              | PdO <sub>x</sub> /TiNTs                           | NaOOCH                                         | 25               | 45.6                   | ~100            | This work           |
| 2              | Pd/TiNTs                                          | NaOOCH                                         | 25               | 17.4                   | ~100            |                     |
| 3              | 7% Ca/Co <sub>3</sub> O <sub>4</sub>              | NaBH <sub>4</sub>                              | 35               | 0.66                   | -               | Ref. 1 <sup>1</sup> |
| 4 <sup>a</sup> | Pt <sub>55</sub> Pd <sub>38</sub> Bi <sub>7</sub> | NaBH <sub>4</sub>                              | 20               | 1.92                   | -               | Ref. 2 <sup>2</sup> |
| 5 <sup>a</sup> | Ni <sub>70</sub> Pd <sub>30</sub>                 | N <sub>2</sub> H <sub>2</sub> H <sub>2</sub> O | 25               | 4.98                   | ~99             | Ref.3 <sup>3</sup>  |
| 6              | Cu NCs <sup>b</sup>                               | NaBH <sub>4</sub>                              | 40               | 3.6                    | -               | Ref. 4 <sup>4</sup> |
| 7              | N-NG <sup>c</sup>                                 | NaBH <sub>4</sub>                              | 25               | 0.9                    | ~100            | Ref. 5 <sup>5</sup> |

a. Calculation based on Pd,

b. Cu NCs: faceted copper nanocrystals,

c. N-doped graphene.

**Table S2** Acidity ( $K_a$ ) and acidity coefficient ( $pK_a$ ) of different standard solutions.

| Entry | $K_a$              | $pK_a$          |
|-------|--------------------|-----------------|
| 1     | NaOOCH             | 7.0-8.5 (0.1 M) |
| 2     | NaHCO <sub>3</sub> | 10.321          |
| 3     | PNP                | 7.15            |
| 4     | PAmP               | 5.48            |

## References

1. B. M. Mogudi, P. Ncube, N. Bingwa, et al., *Appl. Catal. B-Environ.*, 2017, **218**, 240-248.
2. Y.-Y. Shen, Y. Sun, L.-N. Zhou, et al., *Journal of Materials Chemistry A*, 2014, **2**, 2977-2984.
3. D. Bhattacharjee, K. Mandal and S. Dasgupta, *RSC Advances*, 2016, **6**, 64364-64373.
4. P. Zhang, Y. Sui, G. Xiao, et al., *J. Mater. Chem. A*, 2013, **1**, 1632-1638.
5. X.-k. Kong, Z.-y. Sun, M. Chen, et al., *Energy & Environmental Science*, 2013, **6**, 3260-3266.
